# Supplementary material for: Enzymatic modification of dihydromyricetin by glucosylation and acylation, and its effect on the solubility and antioxidant activity
Source: Royal Society of Chemistry journal article supplement (doi:10.1039/d4ob01682c), 2024-12-10
Supplement: d4ob01682c1.pdf [file d4ob01682c1.pdf]

## Supporting Information

# Enzymatic modification of dihydromyricetin by glucosylation and acylation, and its effect on the solubility and antioxidant activity

*David Rodriguez-Garcia,<sup>a</sup> Jose L. Gonzalez-Alfonso,<sup>a</sup> Carlos Uceda,<sup>a</sup> Laura Barahona,<sup>b</sup> Marta Ruiz-Nuñez,<sup>c</sup> Antonio O. Ballesteros,<sup>a</sup> Tom Desmet,<sup>d</sup> Julia Sanz-Aparicio,<sup>c</sup> Maria Fernandez-Lobato,<sup>b</sup> and Francisco J. Plou,<sup>\*a</sup>*

<sup>a</sup> Instituto de Catálisis y Petroleoquímica, CSIC, 28049 Madrid, Spain.

<sup>b</sup> Centro de Biología Molecular Severo Ochoa, Universidad Autónoma de Madrid, 28049, Madrid, Spain.

<sup>c</sup> Instituto de Química Física Blas Cabrera, CSIC, 28006 Madrid, Spain.

<sup>d</sup> Centre for Synthetic Biology (CSB), Department of Biotechnology, Ghent University, 9000 Ghent, Belgium.

## INDEX

|                   |                                                                                                                                                                                                                              |
|-------------------|------------------------------------------------------------------------------------------------------------------------------------------------------------------------------------------------------------------------------|
| <b>Figure S1</b>  | ESI-MS of dihydromyricetin 4'-O- $\alpha$ -D-glucopyranoside ( <b>1a</b> ) and 3'-O- $\alpha$ -D-glucopyranoside ( <b>1b</b> )                                                                                               |
| <b>Figure S2</b>  | $^1\text{H}$ -NMR of dihydromyricetin 4'-O- $\alpha$ -D-glucopyranoside ( <b>1a</b> )                                                                                                                                        |
| <b>Figure S3</b>  | $^{13}\text{C}$ -NMR of dihydromyricetin 4'-O- $\alpha$ -D-glucopyranoside ( <b>1a</b> )                                                                                                                                     |
| <b>Figure S4</b>  | 2D-HMBC of dihydromyricetin 4'-O- $\alpha$ -D-glucopyranoside ( <b>1a</b> )                                                                                                                                                  |
| <b>Figure S5</b>  | $^1\text{H}$ -NMR of dihydromyricetin 3'-O- $\alpha$ -D-glucopyranoside ( <b>1b</b> )                                                                                                                                        |
| <b>Figure S6</b>  | $^{13}\text{C}$ -NMR of dihydromyricetin 3'-O- $\alpha$ -D-glucopyranoside ( <b>1b</b> )                                                                                                                                     |
| <b>Figure S7</b>  | 2D-HMBC of dihydromyricetin 3'-O- $\alpha$ -D-glucopyranoside ( <b>1b</b> )                                                                                                                                                  |
| <b>Figure S8</b>  |                                                                                                                                                                                                                              |
| <b>Figure S9</b>  | ESI-MS of dihydromyricetin 4'-O-(6-O-octanoyl)- $\alpha$ -D-glucopyranoside ( <b>2a</b> ), 4'-O-(6-O-lauroyl)- $\alpha$ -D-glucopyranoside ( <b>2b</b> ) and 4'-O-(6-O-palmitoyl)- $\alpha$ -D-glucopyranoside ( <b>2c</b> ) |
| <b>Figure S10</b> | $^1\text{H}$ -NMR of dihydromyricetin 4'-O-(6-O-octanoyl)- $\alpha$ -D-glucopyranoside ( <b>2a</b> )                                                                                                                         |
| <b>Figure S11</b> | $^{13}\text{C}$ -NMR of dihydromyricetin 4'-O-(6-O-octanoyl)- $\alpha$ -D-glucopyranoside ( <b>2a</b> )                                                                                                                      |
| <b>Figure S12</b> | 2D-HMBC of dihydromyricetin 4'-O-(6-O-octanoyl)- $\alpha$ -D-glucopyranoside ( <b>2a</b> )                                                                                                                                   |
| <b>Figure S13</b> | $^1\text{H}$ -NMR of dihydromyricetin 4'-O-(6-O-lauroyl)- $\alpha$ -D-glucopyranoside ( <b>2b</b> )                                                                                                                          |
| <b>Figure S14</b> | $^{13}\text{C}$ -NMR of dihydromyricetin 4'-O-(6-O-lauroyl)- $\alpha$ -D-glucopyranoside ( <b>2b</b> )                                                                                                                       |
| <b>Figure S15</b> | 2D-HMBC of dihydromyricetin 4'-O-(6-O-lauroyl)- $\alpha$ -D-glucopyranoside ( <b>2b</b> )                                                                                                                                    |
| <b>Figure S16</b> | $^1\text{H}$ -NMR of dihydromyricetin 4'-O-(6-O-palmitoyl)- $\alpha$ -D-glucopyranoside ( <b>2c</b> )                                                                                                                        |
| <b>Figure S17</b> | $^{13}\text{C}$ -NMR of dihydromyricetin 4'-O-(6-O-palmitoyl)- $\alpha$ -D-glucopyranoside ( <b>2c</b> )                                                                                                                     |
| <b>Figure S18</b> | 2D-HMBC of dihydromyricetin 4'-O-(6-O-palmitoyl)- $\alpha$ -D-glucopyranoside ( <b>2c</b> )                                                                                                                                  |

1a

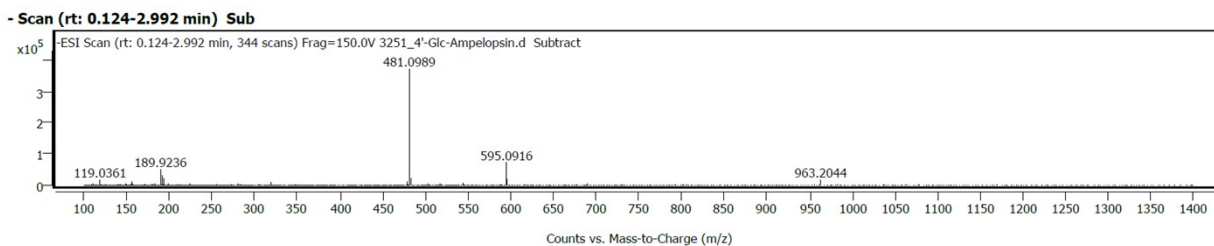

Spectrum Peaks

| m/z      | Z | Abund  | Abund % |
|----------|---|--------|---------|
| 119.0361 |   | 17137  | 4.63    |
| 189.9236 |   | 50273  | 13.57   |
| 191.9206 |   | 31640  | 8.54    |
| 193.9193 |   | 21601  | 5.83    |
| 481.0989 | 1 | 370473 | 100.00  |
| 482.1021 | 1 | 91145  | 24.60   |
| 483.1039 | 1 | 22137  | 5.98    |
| 595.0916 | 1 | 72713  | 19.63   |
| 596.0946 | 1 | 20246  | 5.47    |
| 963.2044 |   | 16869  | 4.55    |

1b

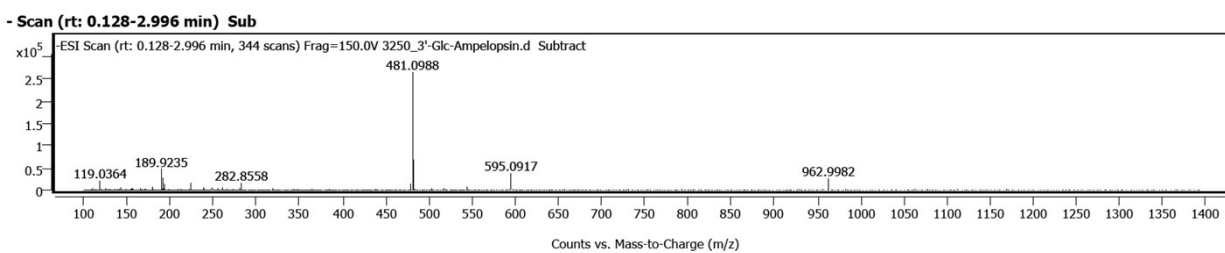

Spectrum Peaks

| m/z      | Z | Abund  | Abund % |
|----------|---|--------|---------|
| 119.0364 |   | 20633  | 7.78    |
| 189.9235 |   | 46927  | 17.69   |
| 191.9204 |   | 27709  | 10.45   |
| 223.9276 |   | 14826  | 5.59    |
| 282.8558 |   | 15870  | 5.98    |
| 481.0988 | 1 | 265225 | 100.00  |
| 482.1020 | 1 | 67242  | 25.35   |
| 483.1039 | 1 | 15724  | 5.93    |
| 595.0917 |   | 37518  | 14.15   |
| 962.9982 |   | 26200  | 9.88    |

Figure S1. ESI-MS of dihydromyricetin 4'-O- $\alpha$ -D-glucopyranoside (**1a**) and dihydromyricetin 3'-O- $\alpha$ -D-glucopyranoside (**1b**)

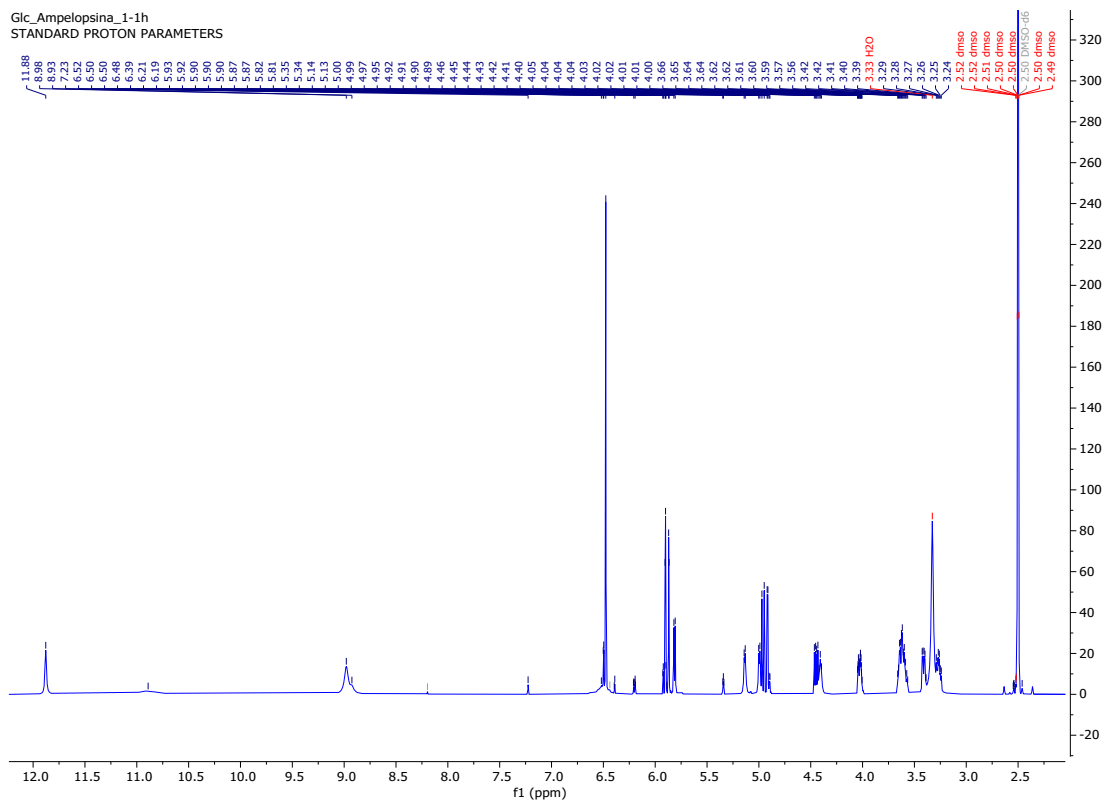

Figure S2.  $^1\text{H}$ -NMR of dihydromyricetin 4'-O- $\alpha$ -D-glucopyranoside (**1a**)

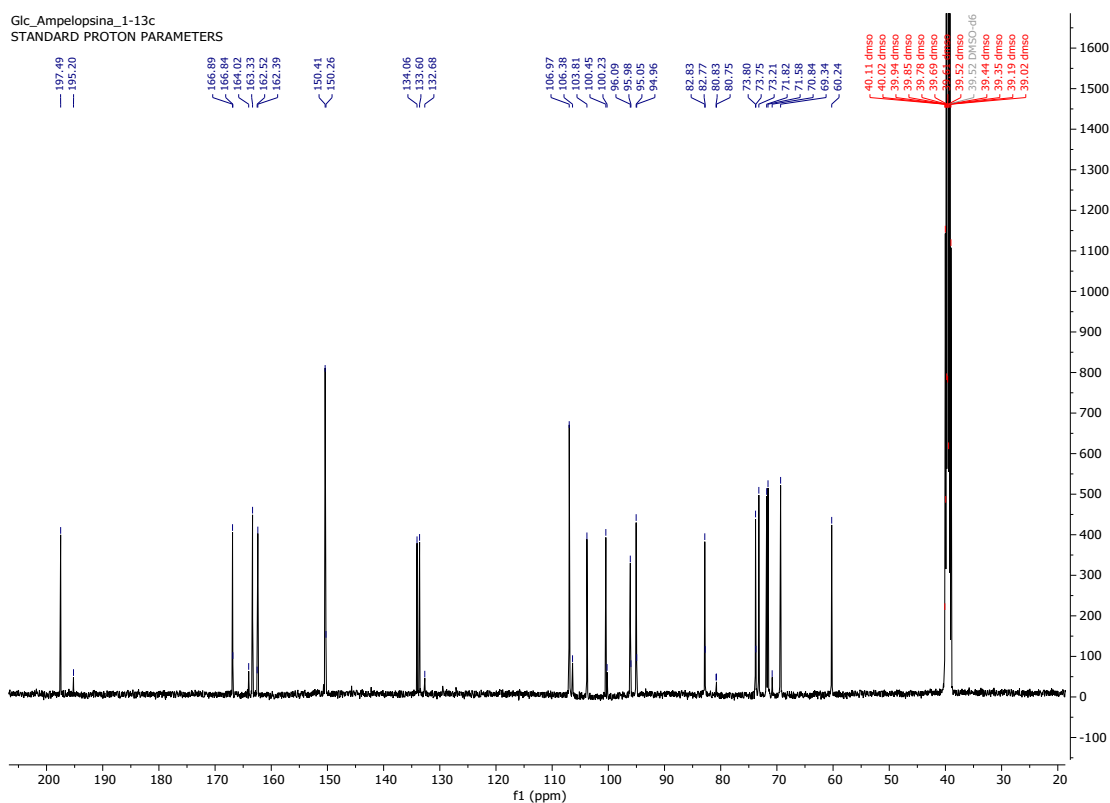

Figure S3.  $^{13}\text{C}$ -NMR of dihydromyricetin 4'-O- $\alpha$ -D-glucopyranoside (**1a**)

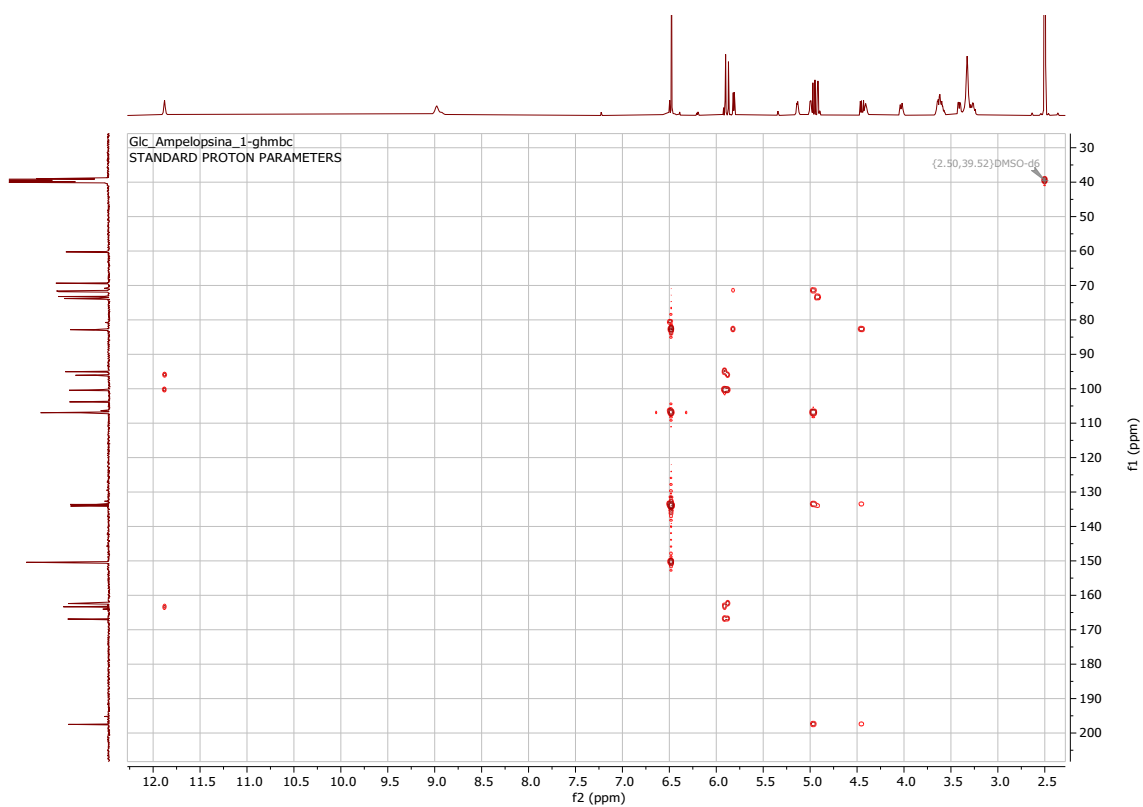

**Figure S4.** 2D-HMBC of dihydromyricetin 4'-O- $\alpha$ -D-glucopyranoside (**1a**)

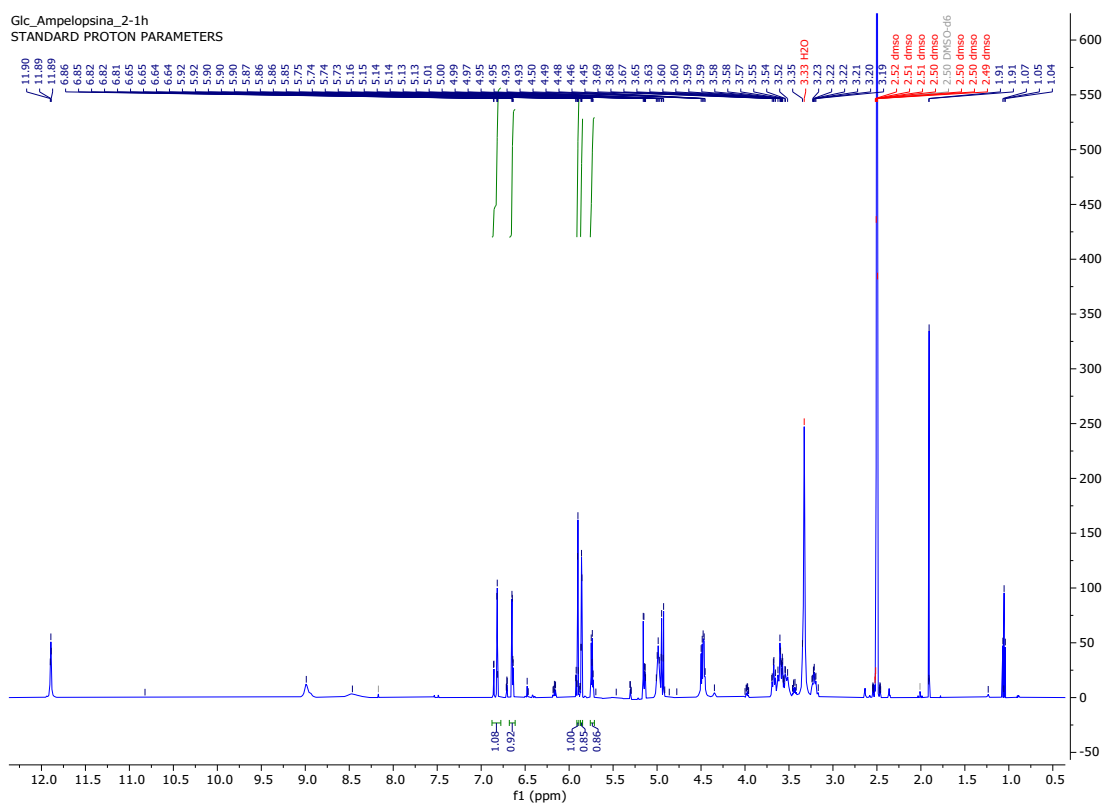

**Figure S5.**  $^1\text{H-NMR}$  of dihydromyricetin 3'-O- $\alpha$ -D-glucopyranoside (**1b**)

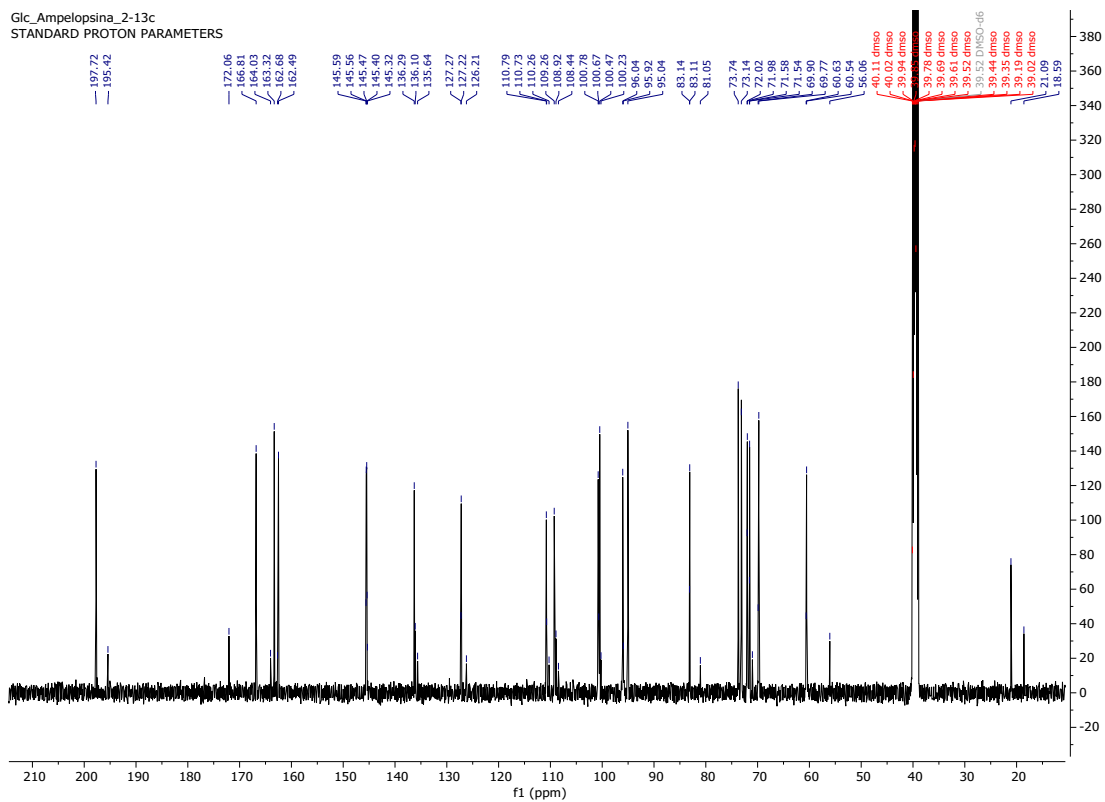

Figure S6.  $^{13}\text{C}$ -NMR of dihydromyricetin 3'-O- $\alpha$ -D-glucopyranoside (**1b**)

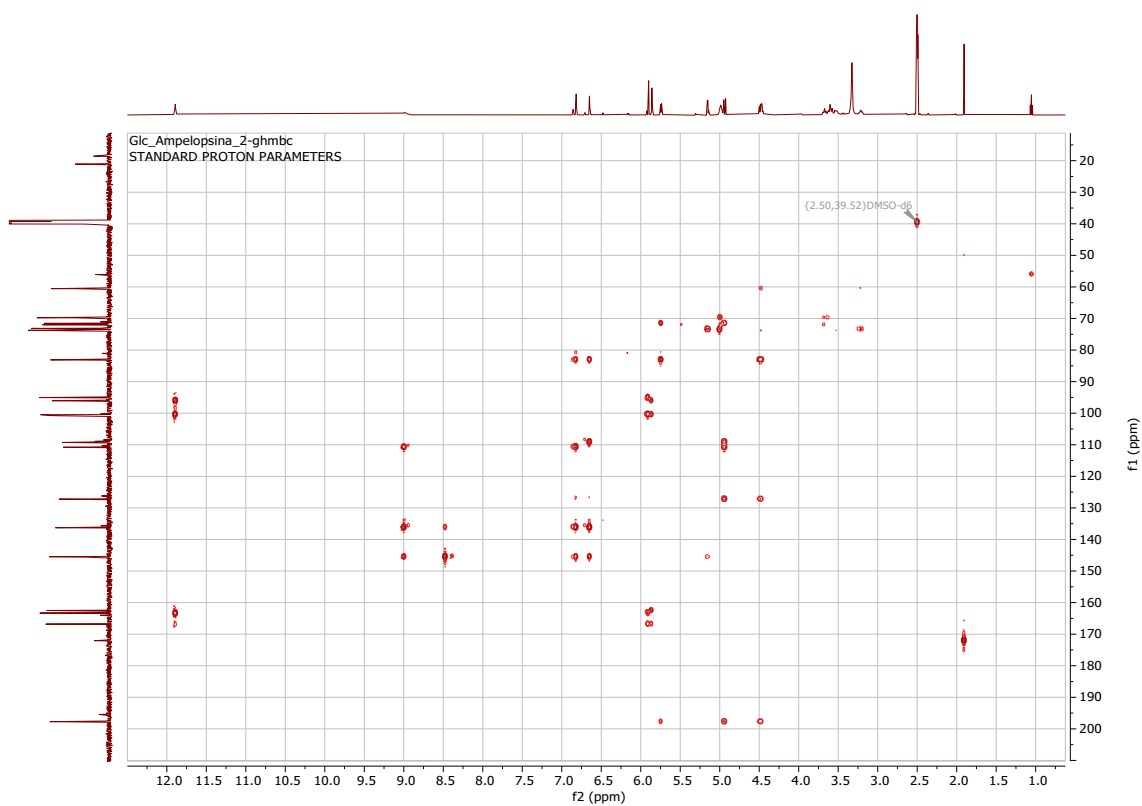

Figure S7. 2D-HMBC of dihydromyricetin 3'-O- $\alpha$ -D-glucopyranoside (**1b**).

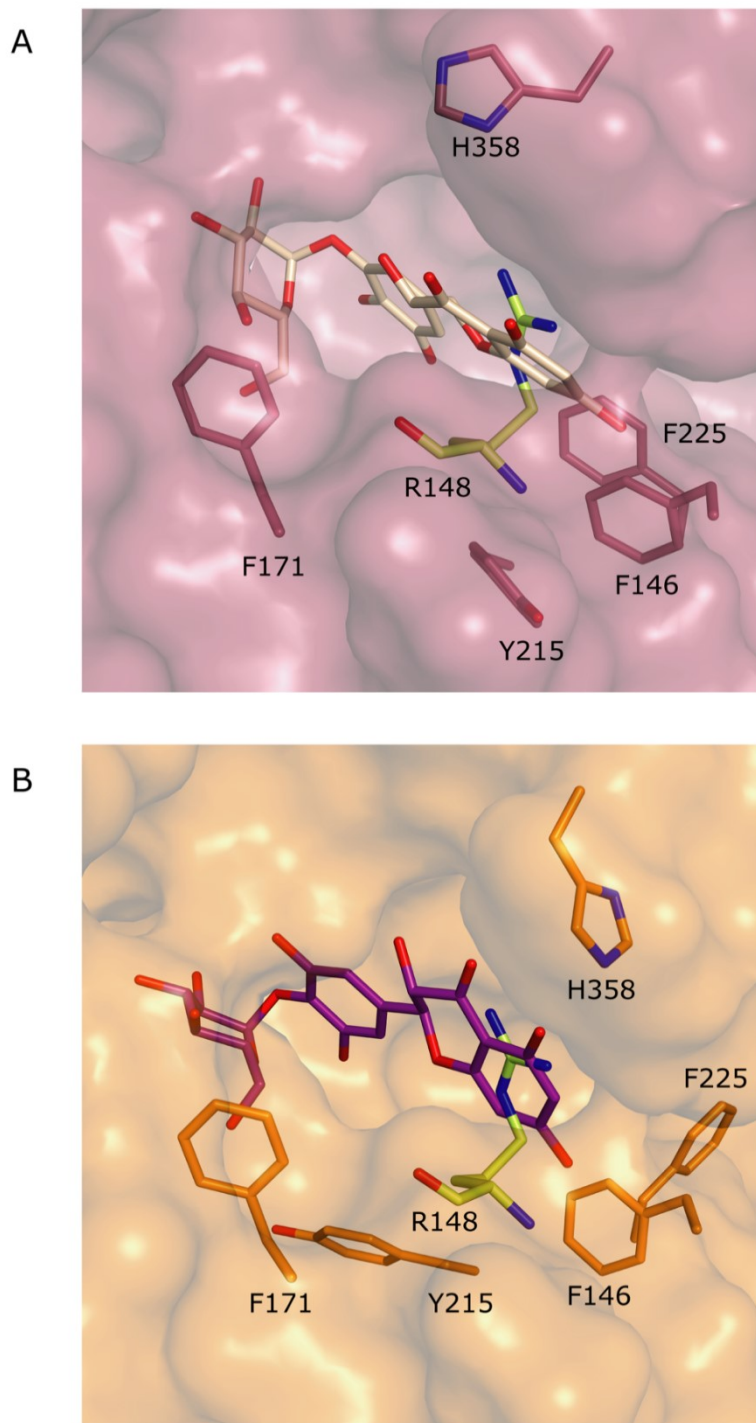

**Figure S8.** Impact of the R134A change (referred to as A148 in the text) on the binding pocket in the fitted structure. Docking simulation of the **(A)** 3'-O- $\alpha$ -D-glucopyranoside and **(B)** 4'-O- $\alpha$ -D-glucopyranoside into the TtSPP\_R134A variant, represented as molecular surface. The final docked conformations of the flexible residues are shown as sticks. The position of Arg148 in the superimposed native enzyme is highlighted in green sticks.

### Sample Spectra

#### - Scan (rt: 0.125-2.993 min) Sub

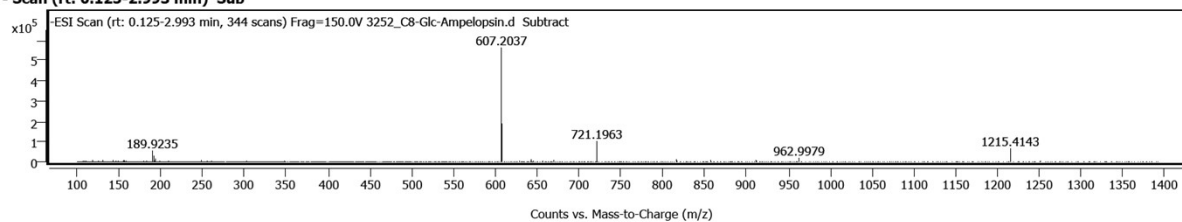

#### Spectrum Peaks

| m/z       | Z | Abund  | Abund % |
|-----------|---|--------|---------|
| 189.9235  |   | 53361  | 9.48    |
| 191.9205  |   | 31222  | 5.55    |
| 607.2037  | 1 | 563064 | 100.00  |
| 608.2065  | 1 | 186366 | 33.10   |
| 609.2087  | 1 | 49142  | 8.73    |
| 721.1963  | 1 | 101063 | 17.95   |
| 722.1994  | 1 | 36146  | 6.42    |
| 962.9979  |   | 19654  | 3.49    |
| 1215.4143 | 1 | 66027  | 11.73   |
| 1216.4174 | 1 | 44243  | 7.86    |

### Sample Spectra

#### - Scan (rt: 0.128-2.996 min) Sub

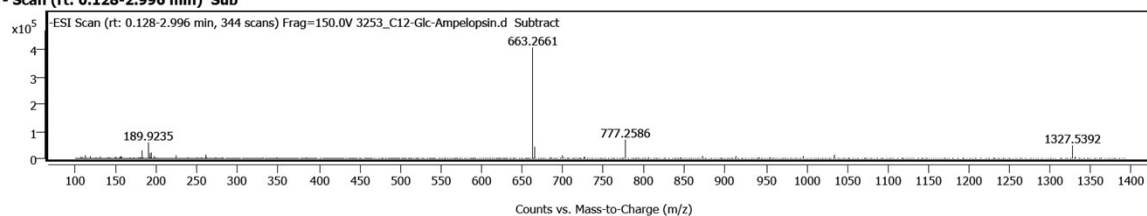

#### Spectrum Peaks

| m/z       | Z | Abund  | Abund % |
|-----------|---|--------|---------|
| 181.9292  |   | 29113  | 7.13    |
| 189.9235  |   | 56695  | 13.89   |
| 193.9192  |   | 20371  | 4.99    |
| 663.2661  | 1 | 408264 | 100.00  |
| 664.2691  | 1 | 153778 | 37.67   |
| 665.2713  | 1 | 42176  | 10.33   |
| 777.2586  | 1 | 68374  | 16.75   |
| 778.2620  | 1 | 28133  | 6.89    |
| 1327.5392 | 1 | 46635  | 11.42   |
| 1328.5422 | 1 | 36415  | 8.92    |

### Sample Spectra

#### - Scan (rt: 0.124-2.992 min) Sub

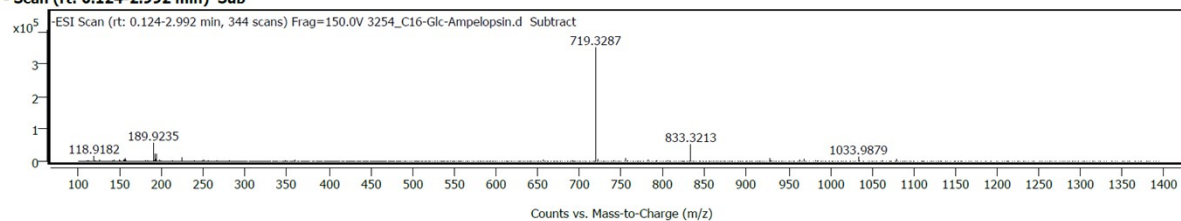

#### Spectrum Peaks

| m/z       | Z | Abund  | Abund % |
|-----------|---|--------|---------|
| 118.9182  |   | 17340  | 4.90    |
| 189.9235  |   | 57693  | 16.30   |
| 191.9205  |   | 22277  | 6.29    |
| 193.9192  |   | 22609  | 6.39    |
| 719.3287  | 1 | 353945 | 100.00  |
| 720.3318  | 1 | 149897 | 42.35   |
| 721.3340  | 1 | 42807  | 12.09   |
| 833.3213  | 1 | 53068  | 14.99   |
| 834.3244  | 1 | 23939  | 6.76    |
| 1033.9879 |   | 13942  | 3.94    |

**Figure S9.** ESI-MS of dihydromyricetin 4'-O-(6-O-octanoyl)- $\alpha$ -D-glucopyranoside (**2a**), 4'-O-(6-O-lauroyl)- $\alpha$ -D-glucopyranoside (**2b**) and 4'-O-(6-O-palmitoyl)- $\alpha$ -D-glucopyranoside (**2c**).





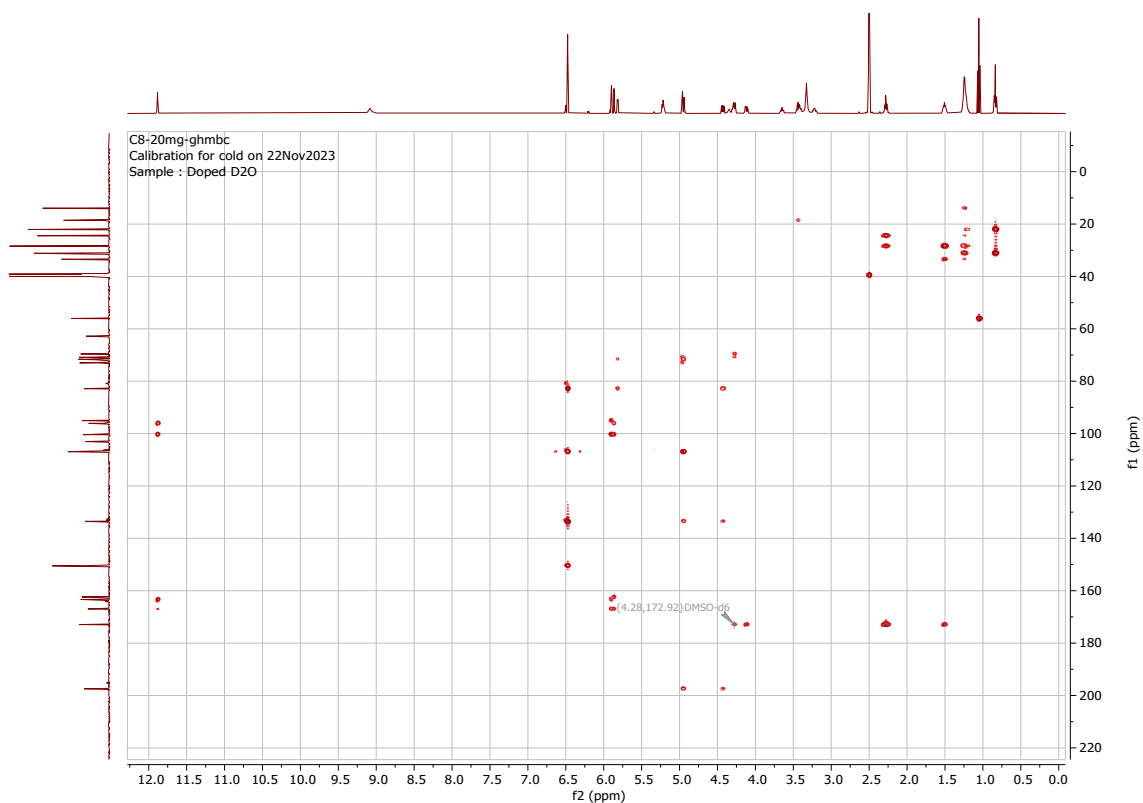

**Figure S12.** 2D-HMBC of dihydromyricetin 4'-O-(6-O-octanoyl)- $\alpha$ -D-glucopyranoside (**2a**)

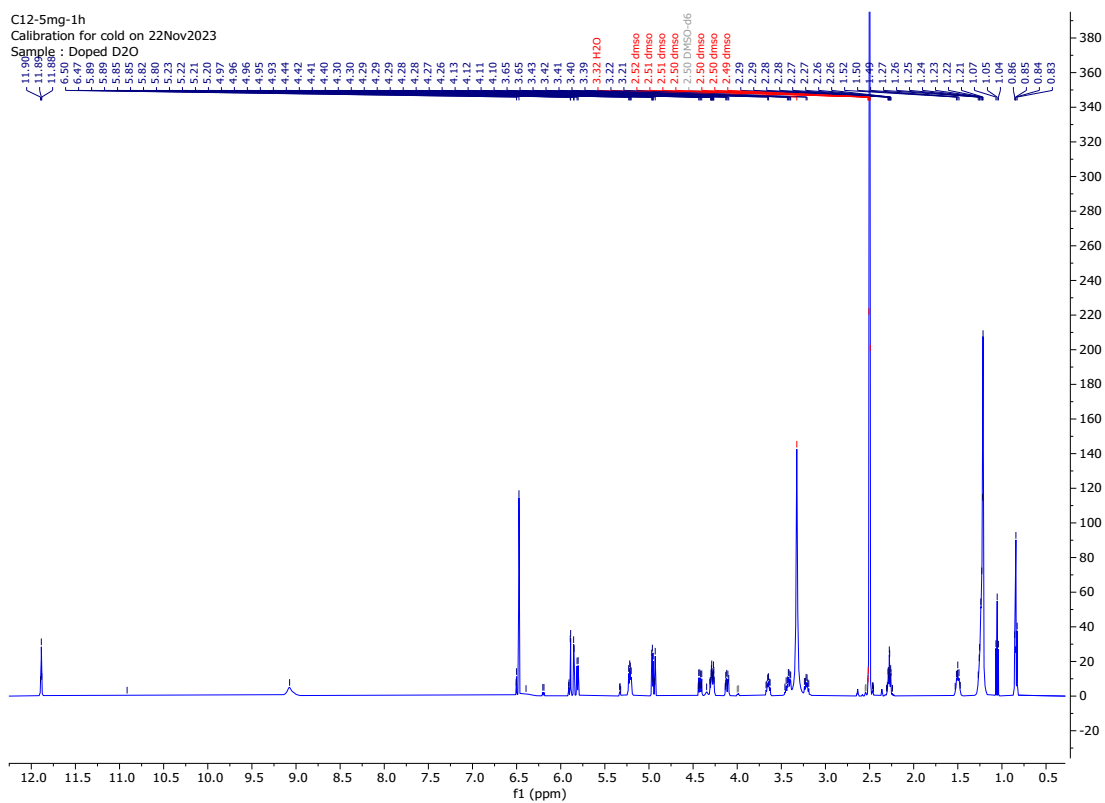

**Figure S13.**  $^1\text{H}$ -NMR of dihydromyricetin 4'-O-(6-O-lauroyl)- $\alpha$ -D-glucopyranoside (**2b**)

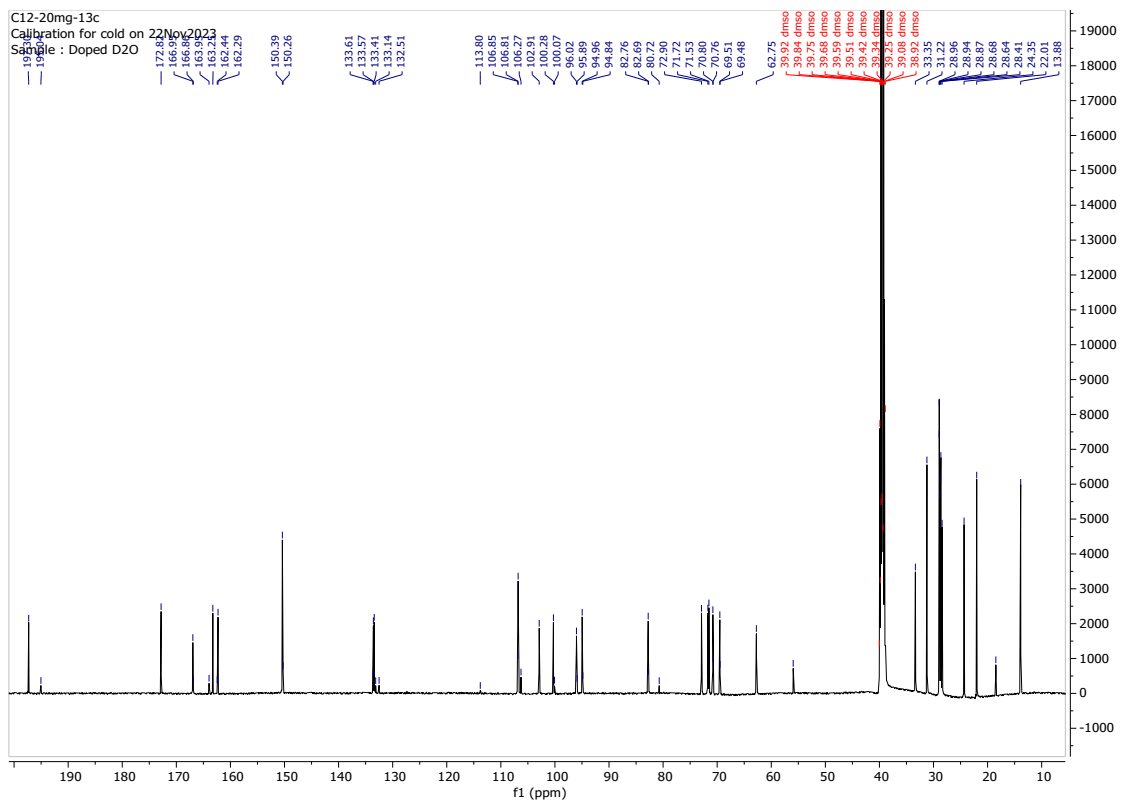

**Figure S14.**  $^{13}\text{C}$ -NMR of dihydromyricetin 4'-O-(6-O-lauroyl)- $\alpha$ -D-glucopyranoside (**2b**)

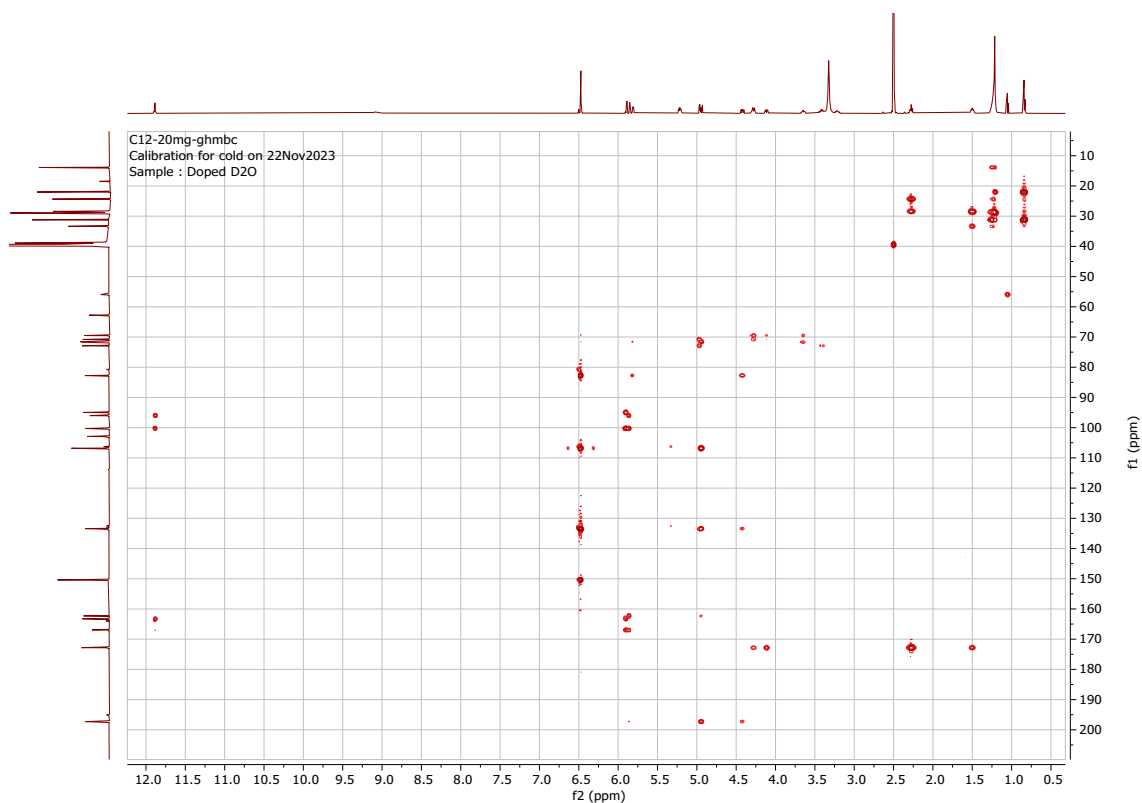

**Figure S15.** 2D-HMBC of dihydromyricetin 4'-O-(6-O-lauroyl)- $\alpha$ -D-glucopyranoside (**2b**)

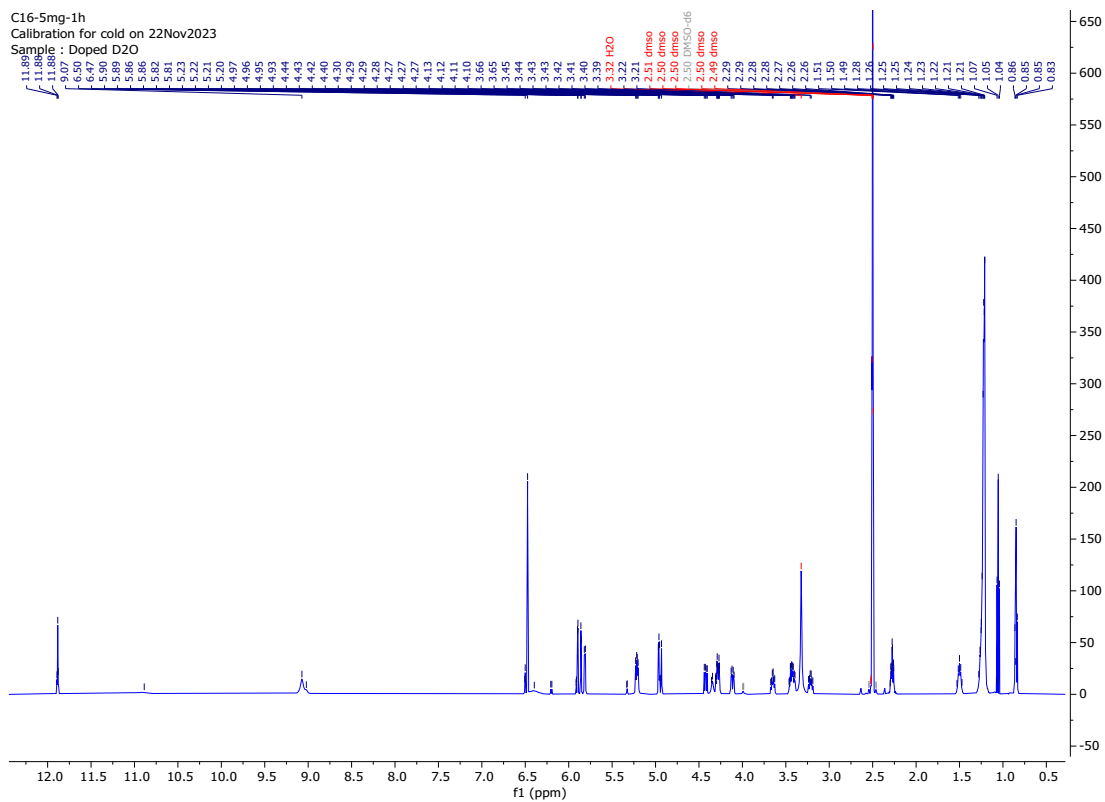

**Figure S16.**  $^1\text{H-NMR}$  of dihydromyricetin 4'-O-(6-O-palmitoyl)- $\alpha$ -D-glucopyranoside (**2c**)

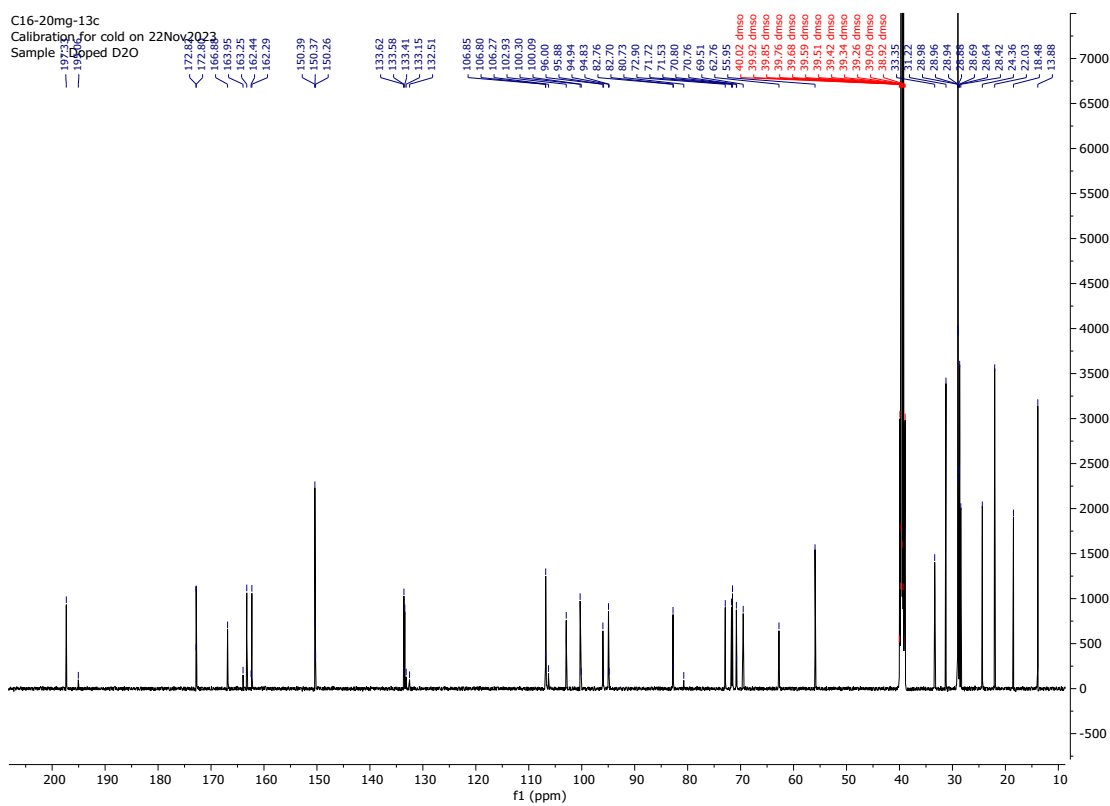

**Figure S17.**  $^{13}\text{C-NMR}$  of dihydromyricetin 4'-O-(6-O-palmitoyl)- $\alpha$ -D-glucopyranoside (**2c**)

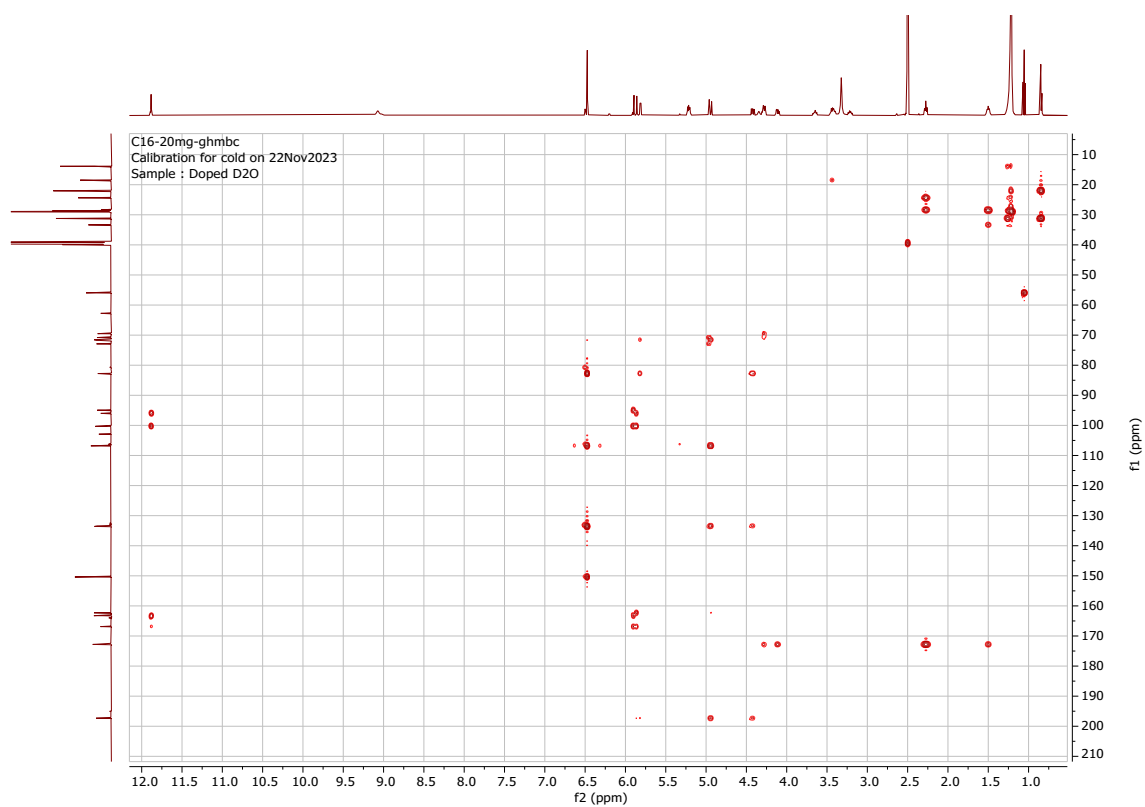

**Figure S18.** 2D-HMBC of dihydromyricetin 4'-O-(6-O-palmitoyl)- $\alpha$ -D-glucopyranoside (**2c**).
